# Supplementary material for: What's at stake? A human well-being based proposal for assessing risk of loss and damage from climate change
Source: Frontiers journal article supplement (doi:10.3389/fclim.2022.1032886), 2022-12-08
Supplement: Table_1.DOCX [file Table_1.DOCX]

Supplementary Material

# Supplementary Figures and Tables

Annex I: Two well-being concepts mapped against real-world loss and damage described in two review studies.

| **Literature review on loss and damage domains** | **Literature review on well-being domains** |
| --- | --- |
| Physical health; Human life; Mental & emotional well-being (Tschakert et al., 2019)  - Health; Loss of life (Fankhauser and Dietz, 2014) | - Physical health; Appropriate health care; A non-hazardous work environment; A non-hazardous physical environment; Physical security; Safe birth control and child-bearing (Gough, 2017)  - Health; Psychological well-being (Verma, 2017) |
| Indirect economic benefits & opportunities (Tschakert et al., 2019) | - Economic security; Adequate nutritious food & water; Adequate protective housing (Gough)  - Living standards (Verma, 2017) |
| - Ecosystem services; Biodiversity & species; Productive land & habitat (Tschakert et al., 2019)  - Ecosystem services; Biodiversity (Fankhauser and Dietz, 2014) | - Ecological diversity & resilience (Verma, 2017) |
| - Social fabric (Tschakert et al., 2019)  - Other social capital (Fankhauser and Dietz, 2014) | - Significant primary relationships (Gough, 2017)  - Community vitality (Verma, 2017) |
| - Culture, lifestyle, traditions, & heritage; Identity; Sense of place (Tschakert et al., 2019)  - Cultural heritage & territory (Fankhauser and Dietz, 2014) | - Cultural understanding; Critical autonomy (Gough, 2017)  - Cultural diversity & resilience (Verma, 2017) |
| - Knowledge & ways of knowing (Tschakert et al., 2019)  - Indigenous & local knowledge & other social capital (Fankhauser and Dietz, 2014) | - Basic education (Gough, 2017)  - Education (Verma, 2017) |
| - Human mobility; Order in the world; Sovereignty; Territory; Ability to solve problems (Tschakert et al., 2019)  - Human mobility (Fankhauser and Dietz, 2014) | - Critical autonomy; Security in childhood (Gough, 2017)  - Good governance (Verma, 2017) |
|  | - Time use (Verma, 2017) |
